# Supplementary material for: Antibiotic prophylaxis is not indicated prior to dental procedures for prevention of periprosthetic joint infections: A systematic review and new guidelines from the Dutch Orthopaedic and Dental Societies
Source: PubMed Central journal article supplement — Acta Orthop. 2017 Jun 22;88(5):568–74. doi: 10.1080/17453674.2017.1340041 (PMC5560223; doi:10.1080/17453674.2017.1340041), 2017-06-22
Supplement: IORT_A_1340041_SM3248.pdf [file IORT_A_1340041_SM3248.pdf]

## Supplementary data

Table 2. Reasons for exclusion after full-text analysis

| Study reference                                                            | Reason for exclusion                                                                            |
|----------------------------------------------------------------------------|-------------------------------------------------------------------------------------------------|
| <b>Primary search: systematic reviews and randomized controlled trials</b> |                                                                                                 |
| Aminoshariae & Kulild 2010                                                 | Review; no primary research                                                                     |
| Brennan et al. 2007                                                        | Subject: bacteremia after tooth extraction in children                                          |
| de Andrade et al. 2012                                                     | Subject: effect of chlorhexidine mouthwash on biofilm in dental prostheses                      |
| Deacon et al. 1996                                                         | Review; no primary research                                                                     |
| Dinsbach 2012                                                              | Review; no primary research                                                                     |
| Drangsholt 1998                                                            | Commentary letter to the editor; no primary research                                            |
| Esposito et al. 2003                                                       | Subject: antibiotic prophylaxis during dental implant placement                                 |
| George 1995                                                                | Subject: questionnaire amongst dermatologists                                                   |
| Jones et al. 1997                                                          | Subject: hematogenous infections in vascular prosthesis                                         |
| Krijnen et al. 2001                                                        | Subject: cost and effectiveness in patients with rheumatoid arthritis and orthopedic prostheses |
| Kuong et al. 2009                                                          | Review; no primary research                                                                     |
| Lauber et al. 2007                                                         | Subject: questionnaire on antibiotic prophylaxis prescriptions in Canada                        |
| Legout et al. 2012                                                         | Review; no primary research                                                                     |
| Little et al. 2010                                                         | Authors' opinion on AAOS 2009 guideline; no primary research                                    |
| Little 1994                                                                | Review; no primary research                                                                     |
| Marculescu & Osmon 2005                                                    | Review; no primary research                                                                     |
| Pineiro et al. 2010                                                        | Subject: effect of chlorhexidine mouthwash on bacteremia after dental implant placement         |
| Rosengren & Dixon 2010                                                     | Subject: review on dermatological infection and antibiotic prophylaxis                          |
| Salvi et al. 2008                                                          | Subject: review on effect of diabetes mellitus II on periodontitis and dental peri-implantitis  |
| Schwartz & Larson 2007                                                     | Review; no primary research                                                                     |
| Seymour et al. 2003                                                        | Review; no primary research                                                                     |
| Shurman & Benedetto 2010                                                   | Subject: review on antibiotic prophylaxis in dermatology                                        |
| Strom et al. 2000                                                          | Subject: risk factors for endocarditis                                                          |
| Sziegoleit et al. 1999                                                     | Subject: analysis of oral microbiome                                                            |
| Tong & Theis 2008                                                          | Subject: questionnaire in New Zealand; no primary research                                      |
| Tornos et al. 2005                                                         | Subject: review on endocarditis                                                                 |
| Treister & Glick. 1999                                                     | Subject: review on oral healthcare and rheumatoid arthritis                                     |
| Uçkay et al. 2008                                                          | Review; no primary research                                                                     |
| Uyemura 1995                                                               | Review; no primary research                                                                     |
| Van der Bruggen & Mudrikova 2007                                           | Review; no primary research                                                                     |
| Watters et al. 2013                                                        | Review of AAOS/ADA guideline 2012; no primary research                                          |
| Wijngaarden & Kruize 2007                                                  | Review; no primary research                                                                     |
| <b>Secondary search: observational studies</b>                             |                                                                                                 |
| Hamilton & Jamieson 2008                                                   | Subject: prospective study on PJI, but no description of dental treatment related to HPJI       |
| Lacassin et al. 1995                                                       | Subject: study on endocarditis risk factors                                                     |
| Meer (van der) et al. 1992                                                 | Subject: endocarditis                                                                           |
| Meijndert et al. 2010                                                      | Subject: oral microbiome                                                                        |
| Powell et al. 2005                                                         | Subject: periodontal treatment                                                                  |
| Wicht et al. 2004                                                          | Subject: effect of chlorhexidine mouthwash on prevention of caries                              |
| Young et al. 2014                                                          | Review; no primary research                                                                     |

Table 4. Bias assessment of the studies included, according to the GRADE method

| Study reference          | Bias due to a non-representative or ill-defined sample of patients? <sup>a</sup> | Bias due to insufficiently long or incomplete follow-up, or differences in follow-up between treatment groups? <sup>b</sup> | Bias due to ill-defined or inadequately measured outcome? <sup>c</sup> | Bias due to inadequate adjustment for all important prognostic factors? <sup>d</sup> |
|--------------------------|----------------------------------------------------------------------------------|-----------------------------------------------------------------------------------------------------------------------------|------------------------------------------------------------------------|--------------------------------------------------------------------------------------|
| Ainscow and Denham 1984  | unlikely                                                                         | likely                                                                                                                      | unclear                                                                | likely                                                                               |
| Berbari et al. 2010      | likely                                                                           | unclear                                                                                                                     | unlikely                                                               | unlikely                                                                             |
| Cook et al. 2007         | unlikely                                                                         | unclear                                                                                                                     | unlikely                                                               | likely                                                                               |
| Jacobsen and Murray 1980 | unlikely                                                                         | unclear                                                                                                                     | unclear                                                                | likely                                                                               |
| LaPorte et al. 1999      | unlikely                                                                         | unclear                                                                                                                     | likely                                                                 | likely                                                                               |
| Skaar et al. 2011        | unlikely                                                                         | unclear                                                                                                                     | likely                                                                 | unlikely                                                                             |
| Swan et al. 2011         | likely                                                                           | unlikely                                                                                                                    | likely                                                                 | unlikely                                                                             |
| Uçkay et al. 2009        | unlikely                                                                         | unclear                                                                                                                     | unlikely                                                               | unlikely                                                                             |
| Waldman et al. 1997      | unlikely                                                                         | unclear                                                                                                                     | unlikely                                                               | unlikely                                                                             |

<sup>a</sup> Failure to develop and apply appropriate eligibility criteria: (a) case-control study: under- or over-matching in case-control studies; (b) cohort study: selection of exposed and unexposed from different populations.

<sup>b</sup> Bias is likely if the percentage of patients lost to follow-up is large; or differs between treatment groups; or the reasons for loss to follow-up differ between treatment groups; or length of follow-up differs between treatment groups or is too short. The risk of bias is unclear if the number of patients lost to follow-up, or the reasons why, are not reported.

<sup>c</sup> Flawed measurement or differences in measurement of outcome in treatment and control group. Bias may also result from a lack of blinding of those assessing outcomes (detection or information bias).

<sup>d</sup> Failure to adequately measure all known prognostic factors and/or failure to adequately adjust for these factors in multivariate statistical analysis.

Table 5. An overview of international recommendations

| Country         | Reference <sup>a</sup> | Society / profession <sup>a</sup> | A   | B    | C    | D                     | E    | F              | G    | H                                       |
|-----------------|------------------------|-----------------------------------|-----|------|------|-----------------------|------|----------------|------|-----------------------------------------|
| USA             | ADA + AAOS 1997        | ADA + AAOS                        | no  | yes  | yes  | 2 years               | yes  | n.m.           | yes  | Advisory statement                      |
|                 | ADA + AAOS 2003        | ADA + AAOS                        | no  | yes  | yes  | 2 years               | yes  | n.m.           | yes  | Advisory statement                      |
|                 | AAOS 2009              | AAOS                              | yes | yes  | yes  | n.m.                  | yes  | n.m.           | n.m. | Information statement                   |
|                 | ADA + AAOS 2012        | ADA + AAOS                        | no  | yes  | n.m. | n.m.                  | yes  | ? <sup>c</sup> | n.m. | Evidence based guideline                |
|                 | Chen et al. 2014       | AAOS                              | no  | yes  | n.m. | Lifetime <sup>b</sup> | n.m. | n.m.           | n.m. | International expert consensus          |
| UK              | Sollecito et al. 2015  | ADA                               | no  | yes  | n.m. | n.m.                  | n.m. | n.m.           | n.m. | Evidence based guideline                |
|                 | Simmons et al. 1992    | BSAC                              | no  | no   | n.m. | n.m.                  | n.m. | n.m.           | n.m. | Expert opinion                          |
|                 | Seymour et al. 2003    | BOA + BDA                         | no  | yes  | n.m. | n.m.                  | yes  | yes            | yes  | Expert opinion                          |
| Australia       | Scott et al. 2005      | OS + OMFS                         | no  | yes  | yes  | n.m.                  | yes  | n.m.           | yes  | Expert opinion                          |
| New Zealand     | NZDA 2003              | NZDA                              | no  | yes  | yes  | n.m.                  | yes  | n.m.           | yes  | Code of practice                        |
|                 | NZDA 2013              | NZDA                              | no  | yes  | n.m. | n.m.                  | yes  | n.m.           | yes  | Code of practice                        |
| Canada          | CADTH 2016             | CADTH                             | no  | no   | n.m. | n.m.                  | n.m. | n.m.           | n.m. | Conclusion of review                    |
| South Africa    | Kotzé 2009             | OMFS                              | no  | yes  | yes  | n.m.                  | yes  | n.m.           | yes  | Conclusion of review                    |
| France          | Legout et al. 2012     | AFSSAPS + ANSM                    | no  | no   | no   | no                    | yes  | n.m.           | yes  | Evidence based guideline                |
| Switzerland     | Rossi et al. 2005      | SGINF                             | no  | yes  | yes  | n.m.                  | n.m. | n.m.           | n.m. | Conclusion of review and expert opinion |
|                 | Uçkay et al. 2010      | OS                                | no  | yes  | no   | n.m.                  | yes  | n.m.           | n.m. | Conclusion of review                    |
| Italy           | Sendi et al. 2016      | OS + I                            | no  | no   | yes  | n.m.                  | yes  | yes            | yes  | Conclusion of review                    |
|                 | Termine et al. 2009    | D                                 | no  | yes  | n.m. | n.m.                  | n.m. | n.m.           | n.m. | Conclusion of review                    |
| Norway          | Olsen et al. 2010      | OS + MI                           | no  | n.m. | n.m. | n.m.                  | yes  | n.m.           | n.m. | Conclusion of review                    |
| Sweden          | Sw. Guideline 2012     | OS                                | no  | yes  | n.m. | < 3 mo                | yes  | n.m.           | yes  | Evidence based guideline                |
| The Netherlands | Swierstra et al. 2011  | OS                                | no  | yes  | yes  | n.m.                  | n.m. | n.m.           | n.m. | Evidence based guideline                |

<sup>a</sup> AAOS: American Academy of Orthopaedic Surgeons; ADA: American Dental Association; AFSSAPS/ANSM: French health authorities; BASC: British Society for Antimicrobial Chemotherapy; BOA: British Orthopaedic Association; DE: dentists; IN: infectiologists; NZDA: New Zealand Dental Association; MI: microbiologists; OMFS: oral and maxillofacial surgeons; OS: orthopedic surgeons; SGINF: Swiss Society for Infectious Diseases.

A. AB-prophylaxis should always be considered

B. AB-prophylaxis should be considered in patients with risk factors

C. AB-prophylaxis should be considered in specific dental procedures with an increased risk

D. AB-prophylaxis should be considered in the postoperative risk period

<sup>b</sup> Lifetime for high-risk patients

E. Recommendations for good oral health

F. Recommendations for chlorhexidine mouthwash

<sup>c</sup> Indecisive

G. Dental screening before implant placement

H. Type of recommendation

n.m.: not mentioned.

### Reference list Table 5, Supplementary data

American Academy of Orthopaedic Surgeons. Antibiotic prophylaxis for bacteremia in patients with joint replacements. Information Statement. 2009. [www.aaos.org/about/papers/advistmt/1033asp](http://www.aaos.org/about/papers/advistmt/1033asp) (access 11-11-2012, removed from website) 2009.

American Academy of Orthopaedic Surgeons, American Dental Association. Prevention of orthopaedic implant infection in patients undergoing dental procedures. Evidence based guideline and evidence report. v0.2.2.2.2012; 2012. Website AAOS, Clinical Practice Guideline Unit: [http://www.aaos.org/Research/guidelines/PUDP/PUDP\\_guidelinepdf](http://www.aaos.org/Research/guidelines/PUDP/PUDP_guidelinepdf) (access: 02-05-2015) 2012.

American Dental Association, American Academy of Orthopaedic Surgeons. Antibiotic prophylaxis for dental patients with total joint replacements. Advisory statement. J Am Dent Assoc 1997; 128: 1004-8.

American Dental Association, American Academy of Orthopaedic Surgeons. Antibiotic prophylaxis for dental patients with total joint replacements. J Am Dent Assoc 2003; 134: 895-9.

Canadian Agency for Drugs and Technologies in Health. CADTH Rapid Response Reports. In: Antibiotic Prophylaxis in Patients with Orthopedic Implants Undergoing Dental Procedures: A Review of Clinical Effectiveness, Safety, and Guidelines. Ottawa (ON): Canadian Agency for Drugs and Technologies in Health. Copyright (c) 2016.

Chen A, Haddad F, Lachiewicz P, et al. Prevention of late PJI. J Arthroplasty 2014; 29: 119-28.

New Zealand Dental Association. NZDA code of practice: Antibiotic prophylaxis for dental treatment of patients with prosthetic joint replacements (adopted March 2003). N Z Dent J 2003; 99: 63-4.

New Zealand Dental Association. Antibiotic prophylaxis for patients with prosthetic joint replacements undergoing dental treatment. Code of Practice. [http://www.justsmileconz/\\_files/Prosthesis%20antibiotic%20Prophylaxispdf](http://www.justsmileconz/_files/Prosthesis%20antibiotic%20Prophylaxispdf) 2013.

Scott J F, Morgan D, Avent M, Graves S, Goss A N. Patients with artificial joints: do they need antibiotic cover for dental treatment? Austr Dent J 2005; 50: S45-S53.

Seymour RA, Whitworth J M, Martin M. Antibiotic prophylaxis for patients with joint prostheses - still a dilemma for dental practitioners. British Dental Journal 2003; 194: 649-53.

Simmons N A, Ball A P, Cawson R A, et al. Case against antibiotic prophylaxis for dental treatment of patients with joint prostheses. Letter to Editor. Lancet 1992; 339: 301.

- Sollecito P, Lockhart P B, Paumier T M, et al. The use of prophylactic antibiotics prior to dental procedures in patients with prosthetic joints. Evidence based guideline for dental practitioners - a report of the American Dental Association Council on Scientific Affairs. *J Am Dent Assoc* 2015; 146: 11-16.e8.
- Kotzé M J. Prosthetic joint infection, dental treatment and antibiotic prophylaxis. *Orthop Rev (Pavia)* 2009; 1: e7.
- Legout L, Beltrand E, Migaud H, Senneville E. Antibiotic prophylaxis to reduce the risk of joint implant contamination during dental surgery seems unnecessary. *Orthop Traumatol Surg Res* 2012; 98: 910-4.
- Olsen I, Snorrason F, Lingaas E. Should patients with hip joint prosthesis receive antibiotic prophylaxis before dental treatment? *J Oral Microbiol* 2010; 2.
- Rossi M, Zimmerli W, Furrer H, Zanetti G, Mühlemann K, Tauber MG. Antibiotika zur Prophylaxe hämatogener Spätinfektionen von Gelenkprothesen (die Schweizerische Gesellschaft für Infektiologie). *Schweiz Monatsschr Zahnmed* 2005; 115: 571-5.
- Sendi P, Uckay I, Suva S, Vogt M. Antibiotic prophylaxis during dental procedures in patients with prosthetic joints. *J Bone Joint Infect* 2016; 1: 42-9.
- Swedish Guideline. Indikationer för antibiotikaprofylax i tandvården – ny rekommendation (Swedish). [http://www.lakemedelsverket.se/upload/om-lakemedelsverket/publikationer/information-fran-lakemedelsverket/2012/Rev%20130422\\_inneh%C3%A5llsf%C3%B6rt\\_Information%20fr%C3%A5n%20L%C3%A4kemedelsverket\\_nr%205\\_2012\\_webbpdf](http://www.lakemedelsverket.se/upload/om-lakemedelsverket/publikationer/information-fran-lakemedelsverket/2012/Rev%20130422_inneh%C3%A5llsf%C3%B6rt_Information%20fr%C3%A5n%20L%C3%A4kemedelsverket_nr%205_2012_webbpdf) (access 30-09-2014) 2012.
- Swierstra B A, Vervest A M, Walenkamp G H, et al. Dutch guideline on total hip prosthesis. *Acta Orthop* 2011; 82: 567-76.
- Termine N, Panzarella V, Ciavarella D, et al. Antibiotic prophylaxis in dentistry and oral surgery: use and misuse. *Int Dent J* 2009; 59:2 63-70.
- Uckay I, Hoffmeyer P, Trampuz A, et al. Utilité de la prophylaxie antibiotique avant un geste dentaire pour les porteurs de prothèses totales du genou ou de la hanche. *Revue Méd Suisse* 2010; 6 (243): 727-30.
